# Supplementary material for: Endophytic Bacterium Flexivirga meconopsidis sp. nov. with Plant Growth-Promoting Function, Isolated from the Seeds of Meconopsis integrifolia
Source: MDPI journal article supplement (doi:10.3390/microorganisms11122899), 2023-11-30
Supplement: s1 [file s1]

## Supplementary Materials

# Endophytic Bacterium *Flexivirga meconopsidis* sp. nov. with Plant Growth-Promoting Function, Isolated from the Seeds of *Meconopsis integrifolia*

Yongtao Kan <sup>1,2,3,†</sup>, Li Zhang <sup>4,†</sup>, Yan Wang <sup>2,3,5</sup>, Qingyun Ma <sup>2,3,6</sup>, Yiqing Zhou <sup>2,3</sup>, Xu Jiang <sup>2,3</sup>, Wei Zhang <sup>1,\*</sup> and Zhiyong Ruan <sup>2,3,\*</sup>

<sup>1</sup> College of Life Sciences, Xinjiang Normal University, Urumqi 830017, China; kyt3117428630@126.com

<sup>2</sup> State Key Laboratory of Efficient Utilization of Arid and Semi-Arid Arable Land in Northern China, Institute of Agricultural Resources and Regional Planning, Chinese Academy of Agricultural Sciences, Beijing 100081, China; a18301335070@163.com (Y.W.); mqy@webmail.hzau.edu.cn (Q.M.); zhouyiqing@caas.cn (Y.Z.); jiangxu@caas.cn (X.J.)

<sup>3</sup> CAAS-CIAT Joint Laboratory in Advanced Technologies for Sustainable Agriculture, Institute of Agricultural Resources and Regional Planning, Chinese Academy of Agricultural Sciences, Beijing 100081, China

<sup>4</sup> College of Life Sciences, Yantai University, Yantai 264005, China; wkiaazl@outlook.com

<sup>5</sup> College of Resources and Environment, Tibet Agricultural and Animal Husbandry University, Linzhi 860000, China

<sup>6</sup> National Key Laboratory of Agricultural Microbiology, Huazhong Agricultural University, Wuhan 430070, China

\* Correspondence: 107622009010029@xjnu.edu.cn (W.Z.); ruanzhiyong@caas.cn (Z.R.)

† These authors contributed equally to this work.

**Table S1.** Average nucleotide identity (ANI) and digital DNA–DNA hybridization (dDDH) values between the genome sequence of strain Q11<sup>T</sup> and those of closely related strains.

| Reference strains                               | ANI (%) | dDDH (%) |
|-------------------------------------------------|---------|----------|
| <i>Flexivirga aerilata</i> ID2601S <sup>T</sup> | 88.82   | 36.20    |
| <i>F. caeni</i> BO-16 <sup>T</sup>              | 77.42   | 21.00    |
| <i>F. endophytica</i> KCTC 39536 <sup>T</sup>   | 77.24   | 21.50    |
| <i>F. oryzae</i> R1 <sup>T</sup>                | 78.48   | 22.70    |

**Table S2.** Statistics of the protein identification results.

| Name        | Total spectra | Matched spectrum | Peptide | Identified protein |
|-------------|---------------|------------------|---------|--------------------|
| Supernatant | 81,106        | 1,614            | 794     | 245                |
| Cell        | 80,196        | 41,661           | 20,413  | 2,401              |

**Table S4.** Data of IAA production and nitrogenase activity in strain Q11<sup>T</sup>.

| Strain           | IAA (mg/L) | Nitrogenase (IU/L) |
|------------------|------------|--------------------|
| Q11 <sup>T</sup> | 3.26       | 181.80             |

**Table S5.** Physiochemical properties of the soil.

| pH        | SOM (g/kg) | TN (g/kg) | TK (mg/kg)  | AP (mg/kg) | NH <sub>4</sub> <sup>+</sup> -N (mg/kg) | NO <sub>3</sub> <sup>-</sup> -N (mg/kg) |
|-----------|------------|-----------|-------------|------------|-----------------------------------------|-----------------------------------------|
| 6.01±0.11 | 26.45±0.86 | 1.44±0.03 | 137.51±5.76 | 79.73±5.61 | 25.92±3.89                              | 56.79±3.66                              |

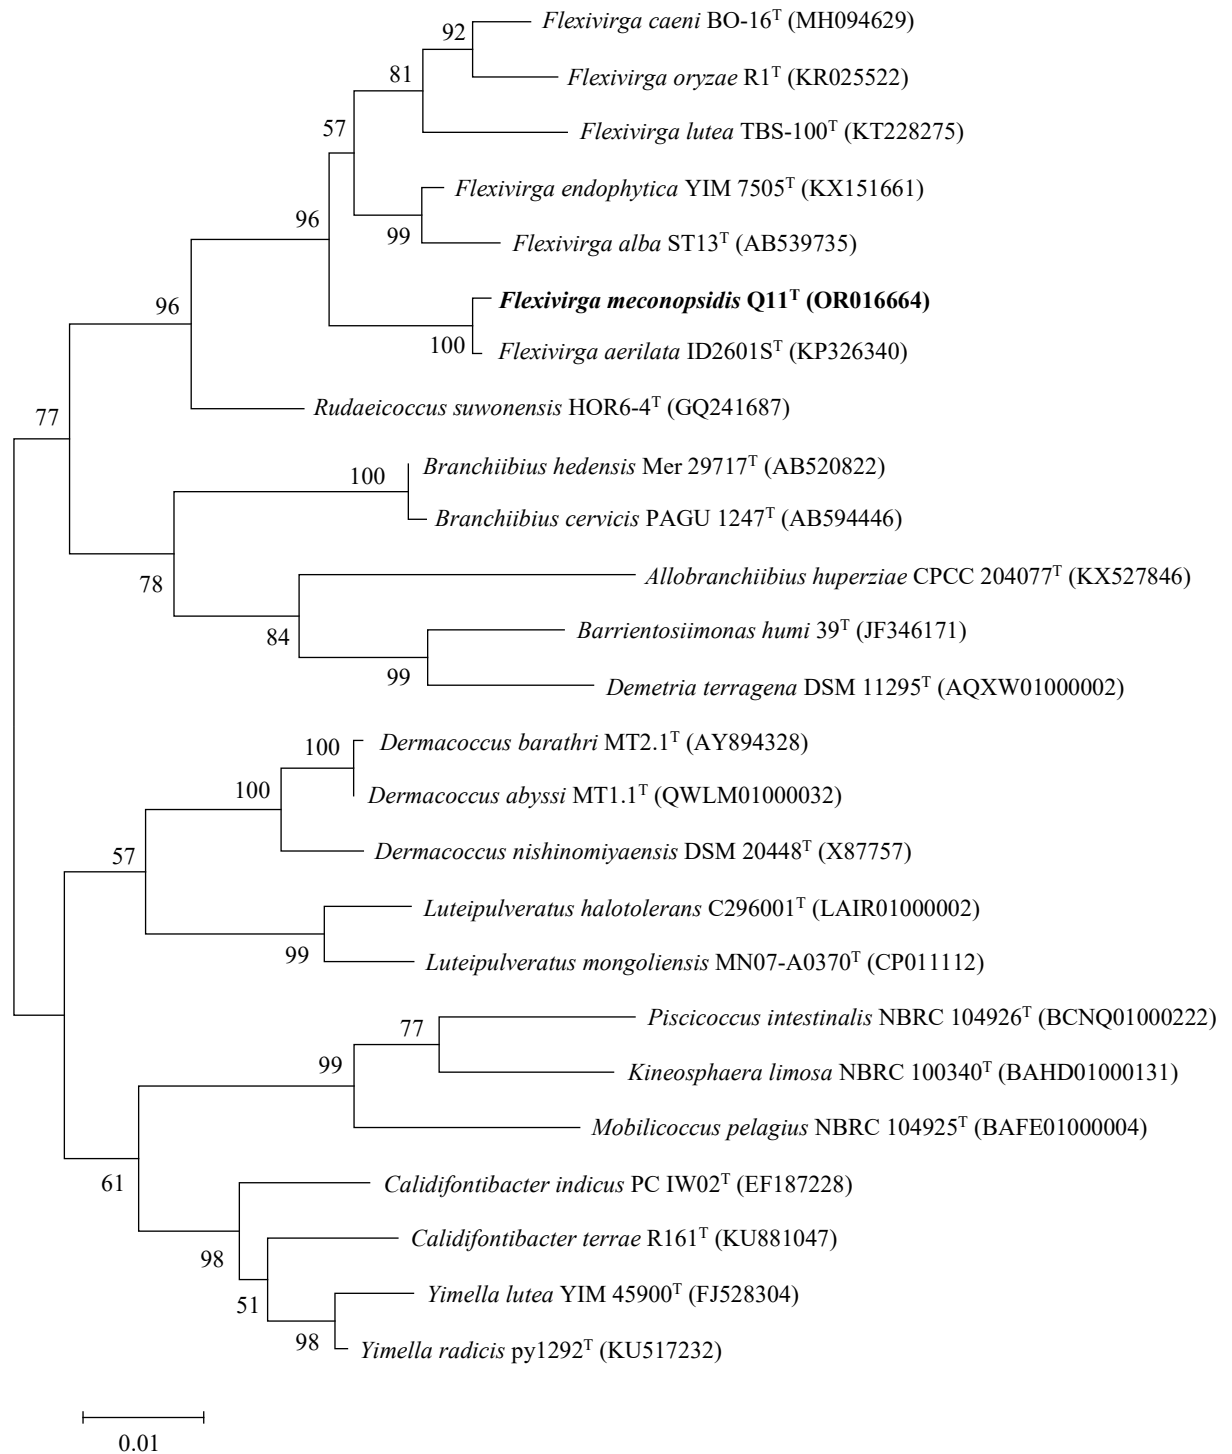

**Figure S1.** Maximum-likelihood phylogenetic tree of strain Q11<sup>T</sup> and its relatives based on the comparison of the 16S rRNA gene sequences. Genbank accession numbers are shown in parentheses.

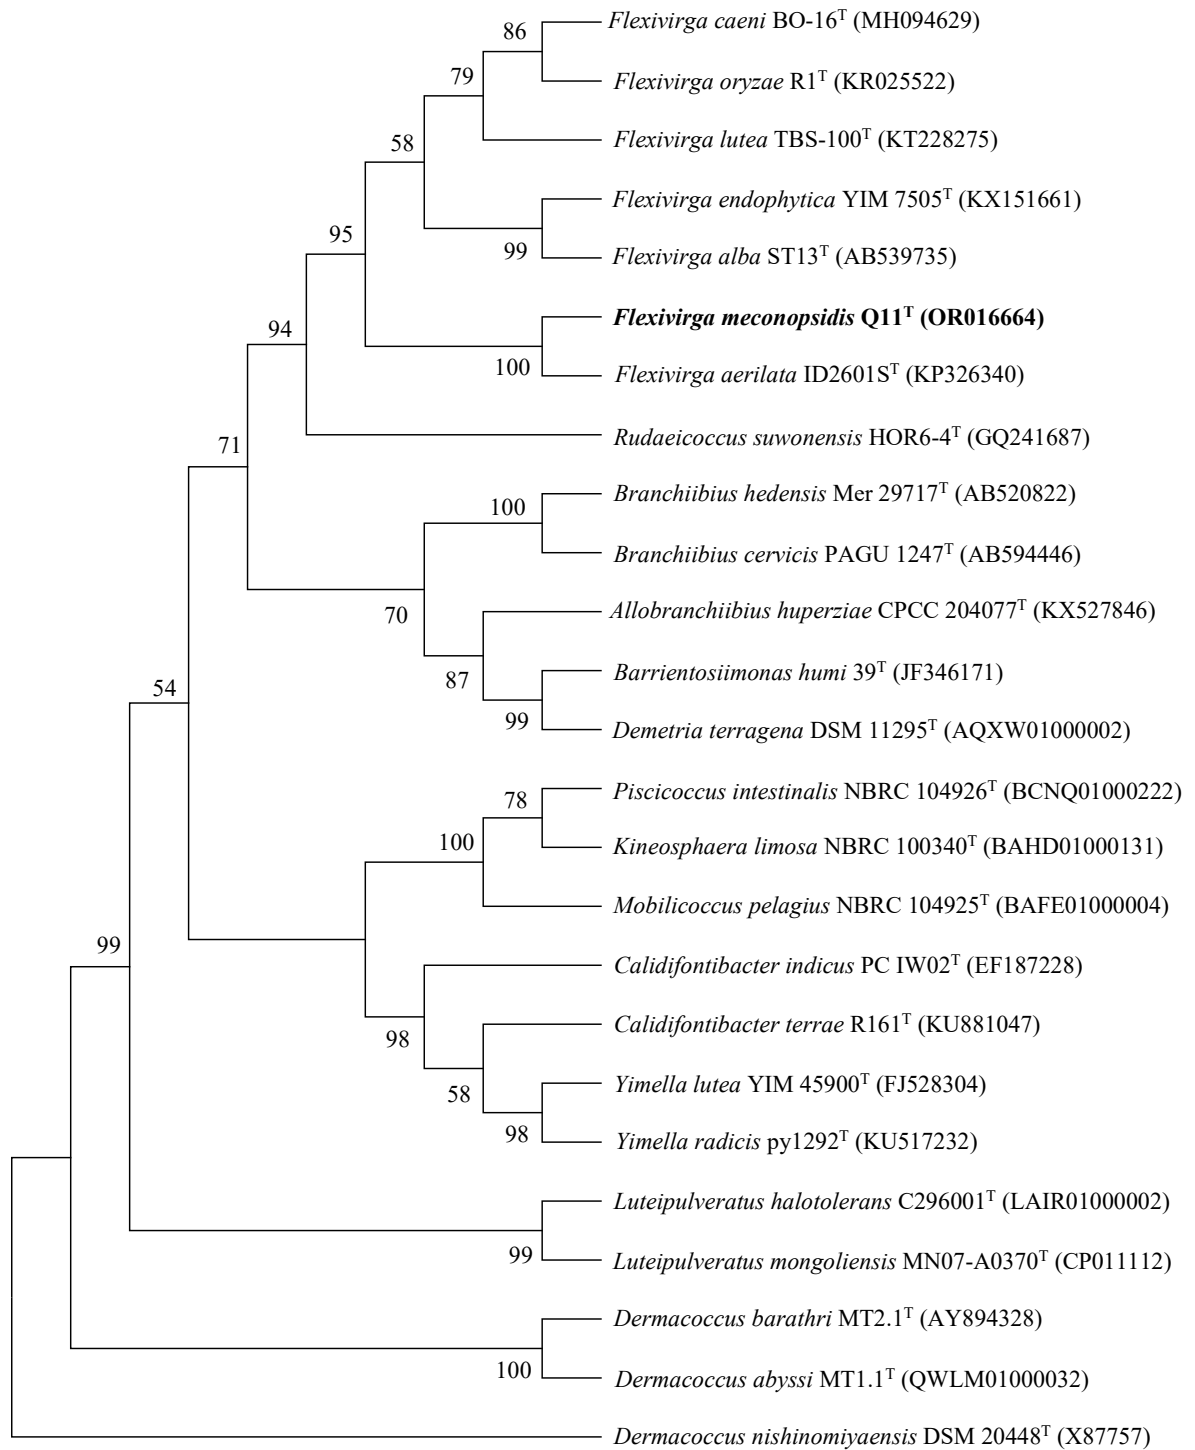

**Figure S2.** Maximum-parsimony phylogenetic tree of strain Q11<sup>T</sup> and its relatives based on the comparison of the 16S rRNA gene sequences. Genbank accession numbers are shown in parentheses.

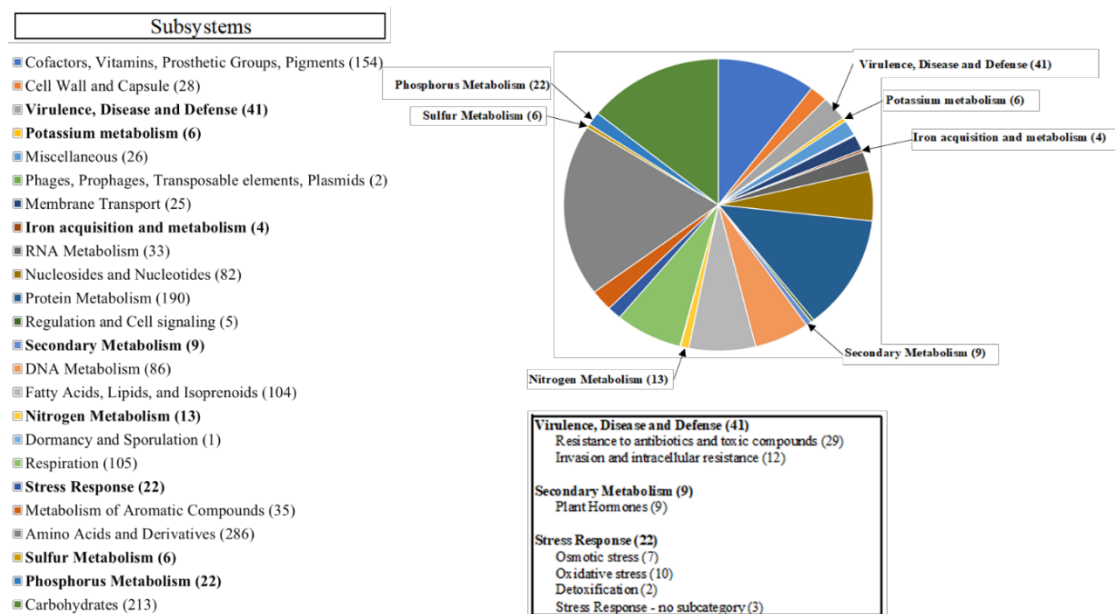

**Figure S3.** Different types of subsystems in the Q11<sup>T</sup> genome. The data were obtained from the RAST server.

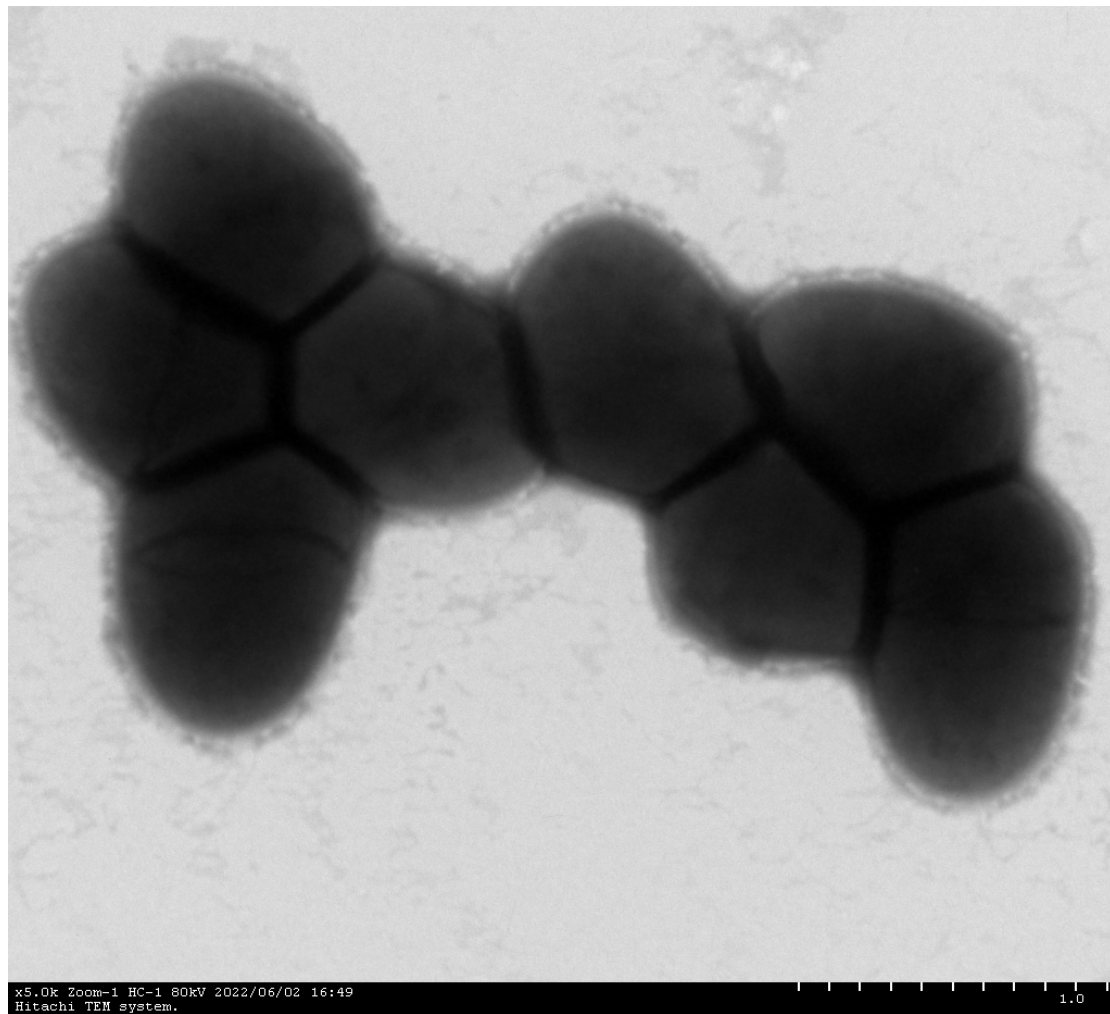

**Figure S4.** Transmission electron micrograph of cells of strain Q11<sup>T</sup>. Bar, 1.0 μm. The cells were incubated on BA at 30 °C for 3 days.

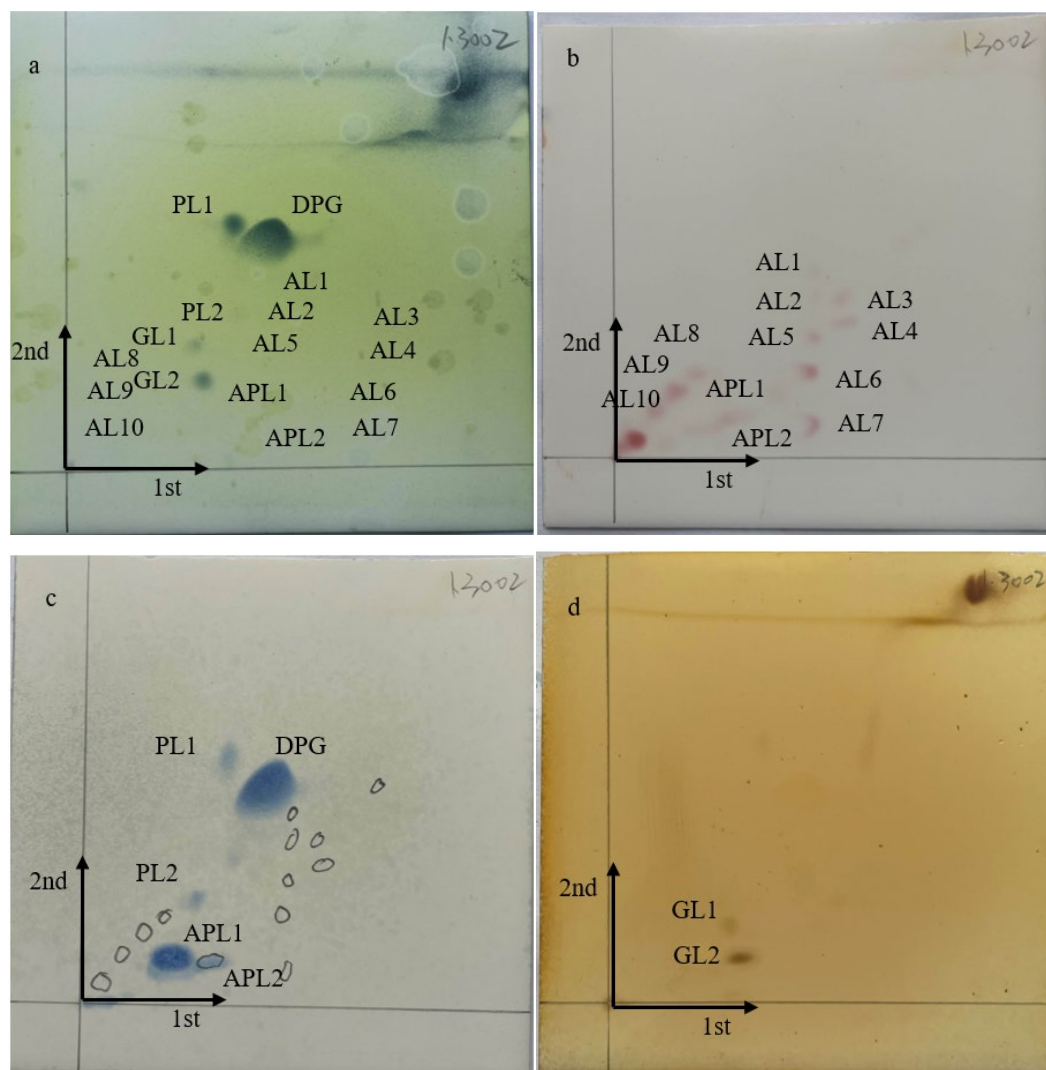

**Figure S5.** The polar lipids of strain Q11<sup>T</sup>. Polar lipids in the strain, separated by two-dimensional TLC, which were detected by spraying with molybdophosphoric acid. a, Molybdophosphoric acid was used to reveal the total polar lipids; b, ninhydrin was used for aminolipids; c, ammonium molybdate was used for phospholipids; and d, a-naphthol was used for glycolipids. DPG, diphosphatidylglycerol; PL (1-2), unidentified phospholipids; APL (1-2), unidentified aminophospholipid; AL (1-10), unidentified aminolipids; GL (1-2), unidentified glycolipids.

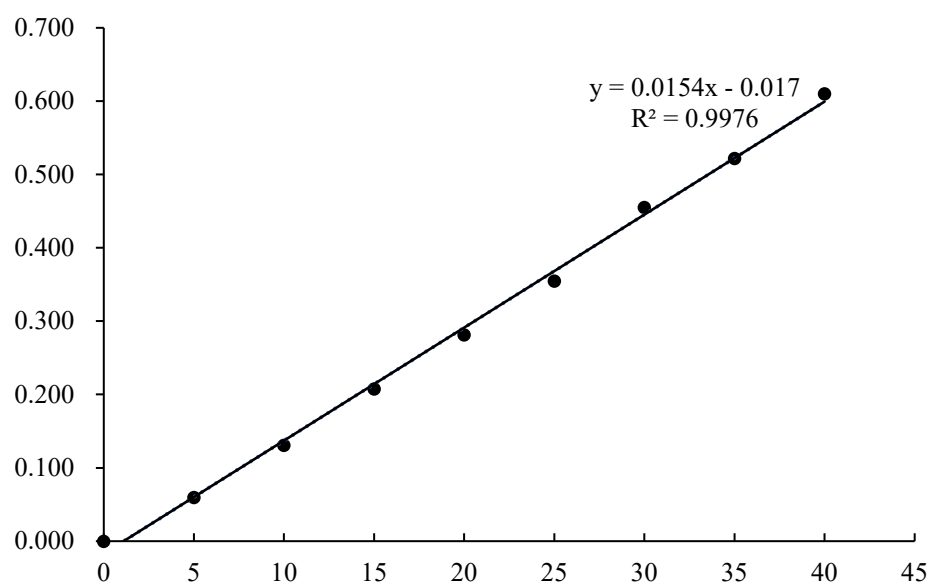

**Figure S6.** The indole acetic acid (IAA) standard curve.

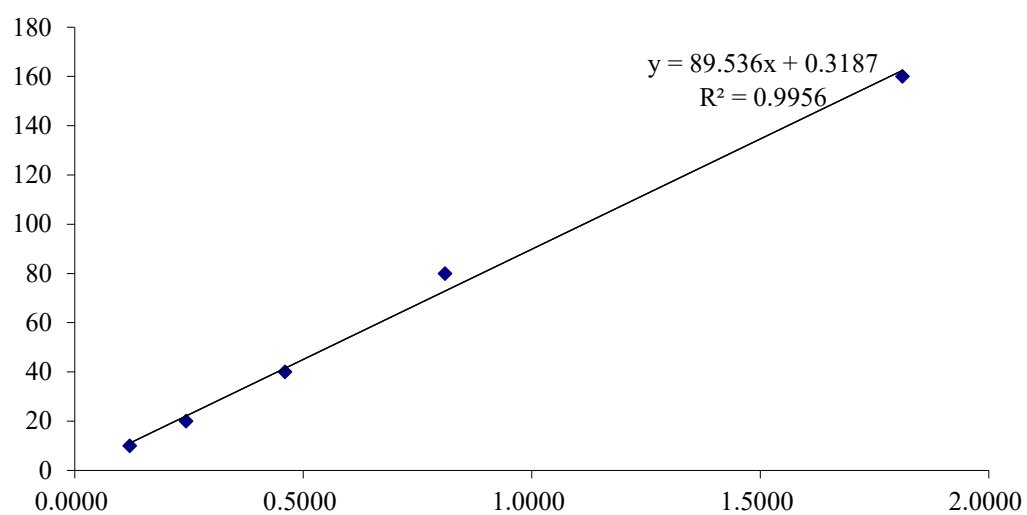

**Figure S7.** Standard curve of nitrogenase activity.
